# Supplementary material
Source: Springer Nature journal article supplement (https://www.springermedizin.de/resource/supplementary/13054_2010_8773_MOESM2_ESM.pdf/9732536)

## A. All patients (n=47)

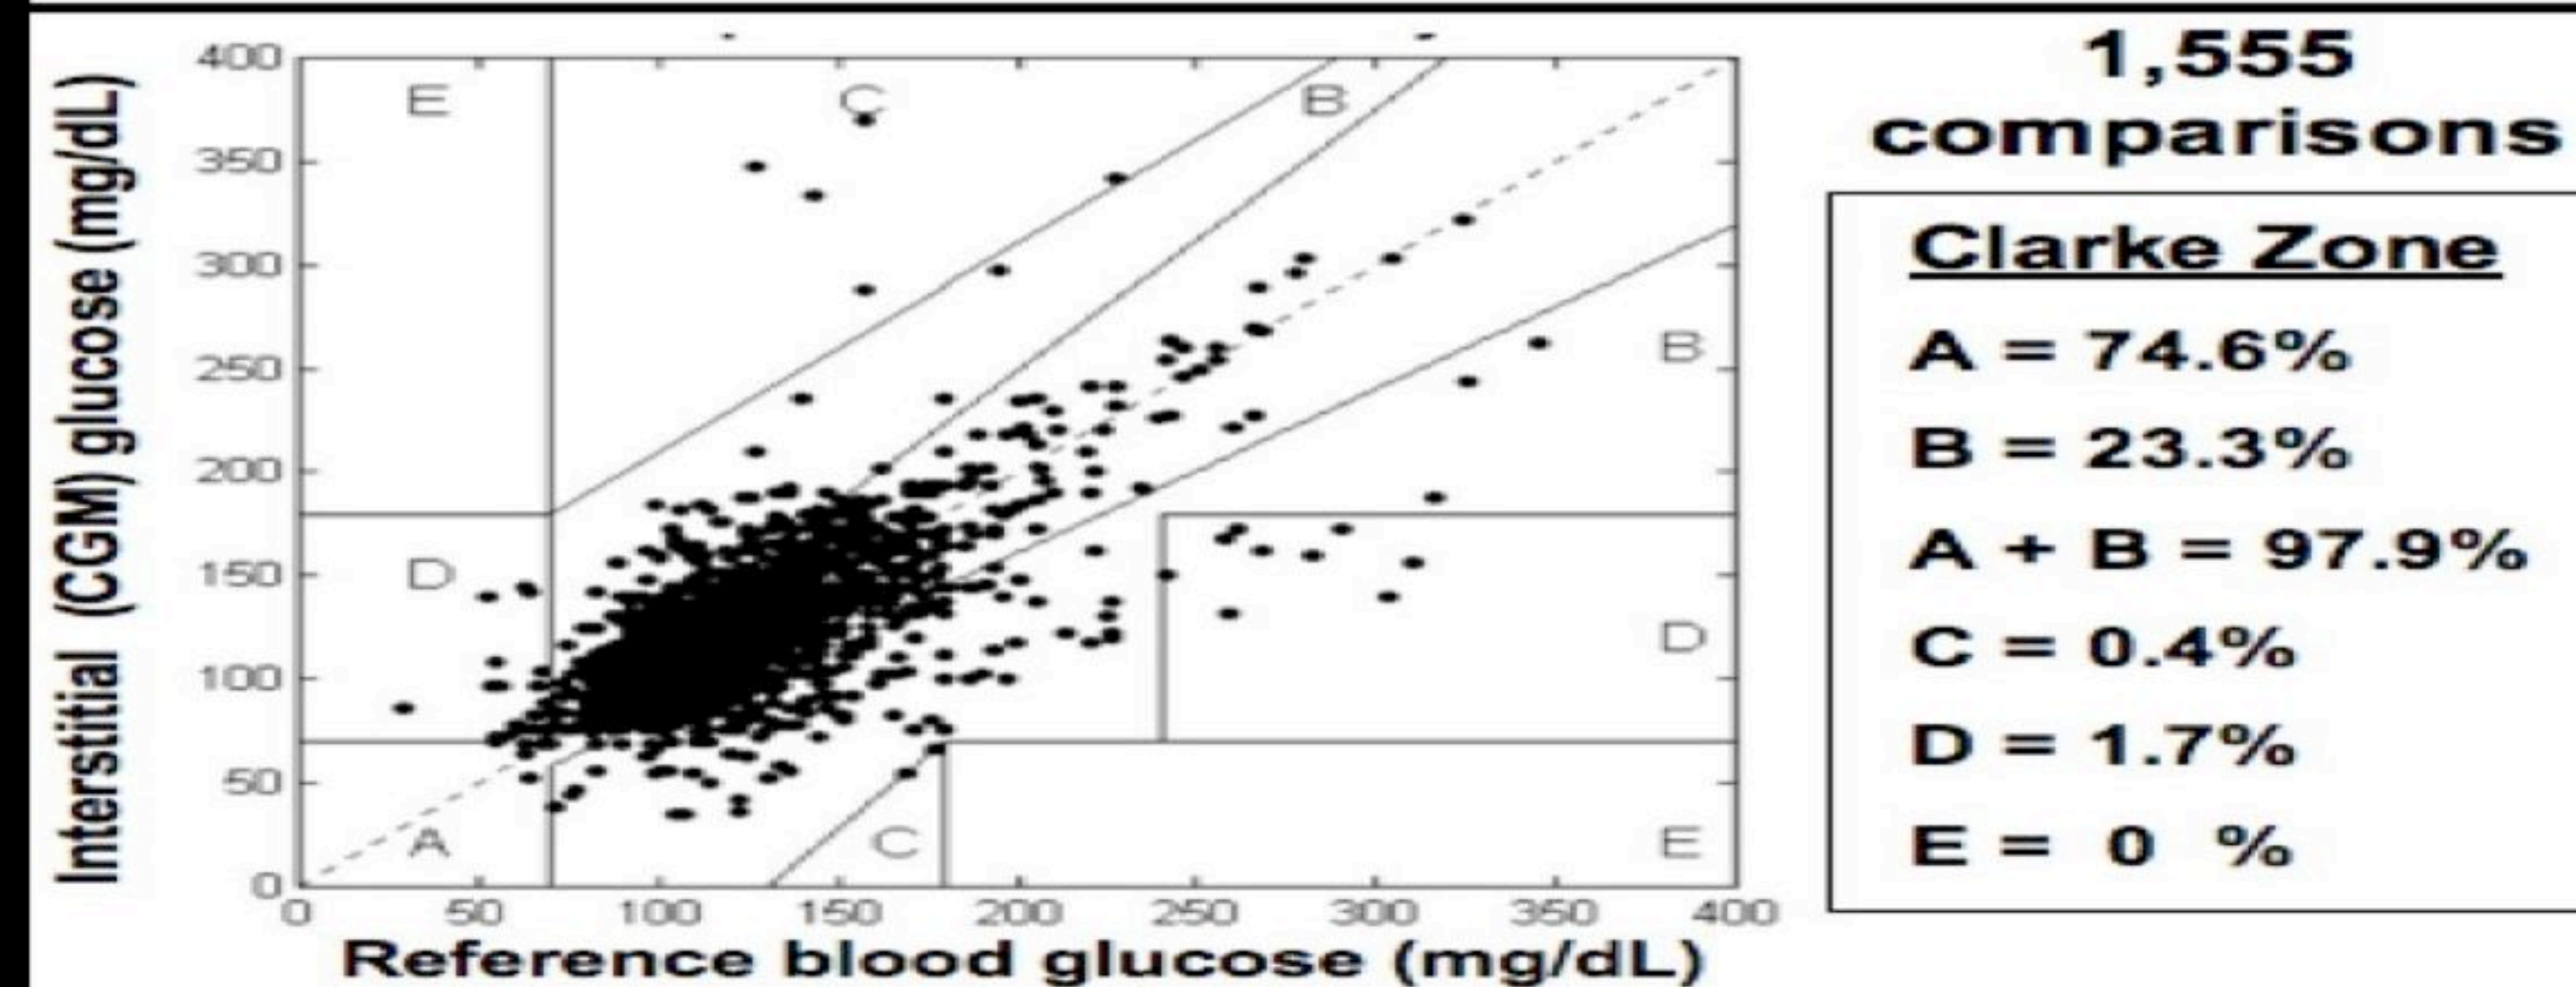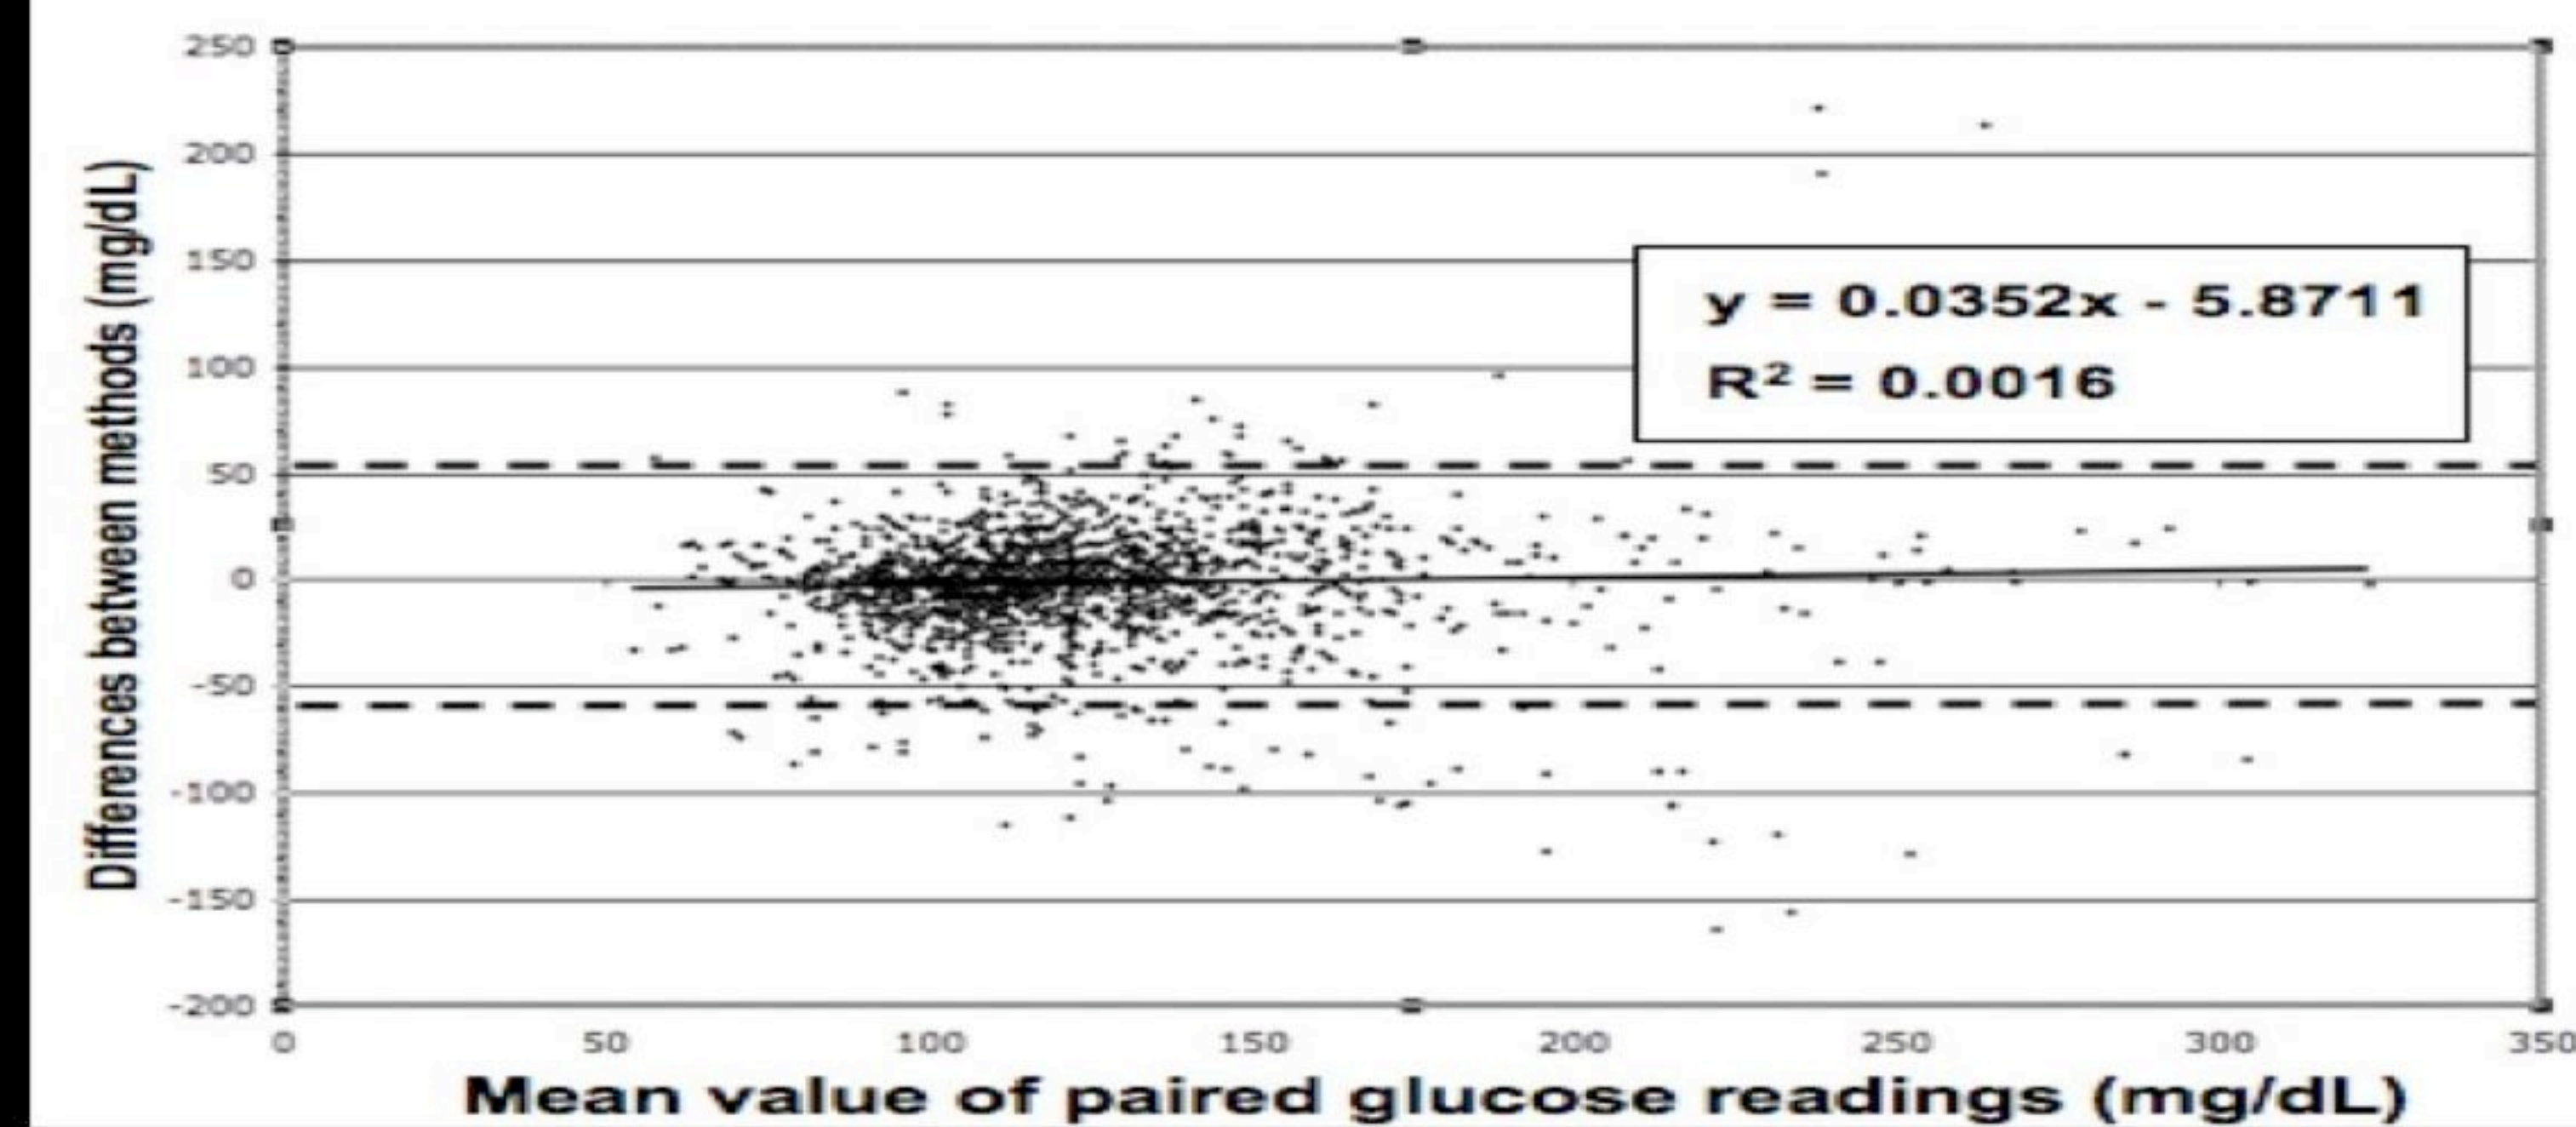

## B. < 1 years old (n=18)

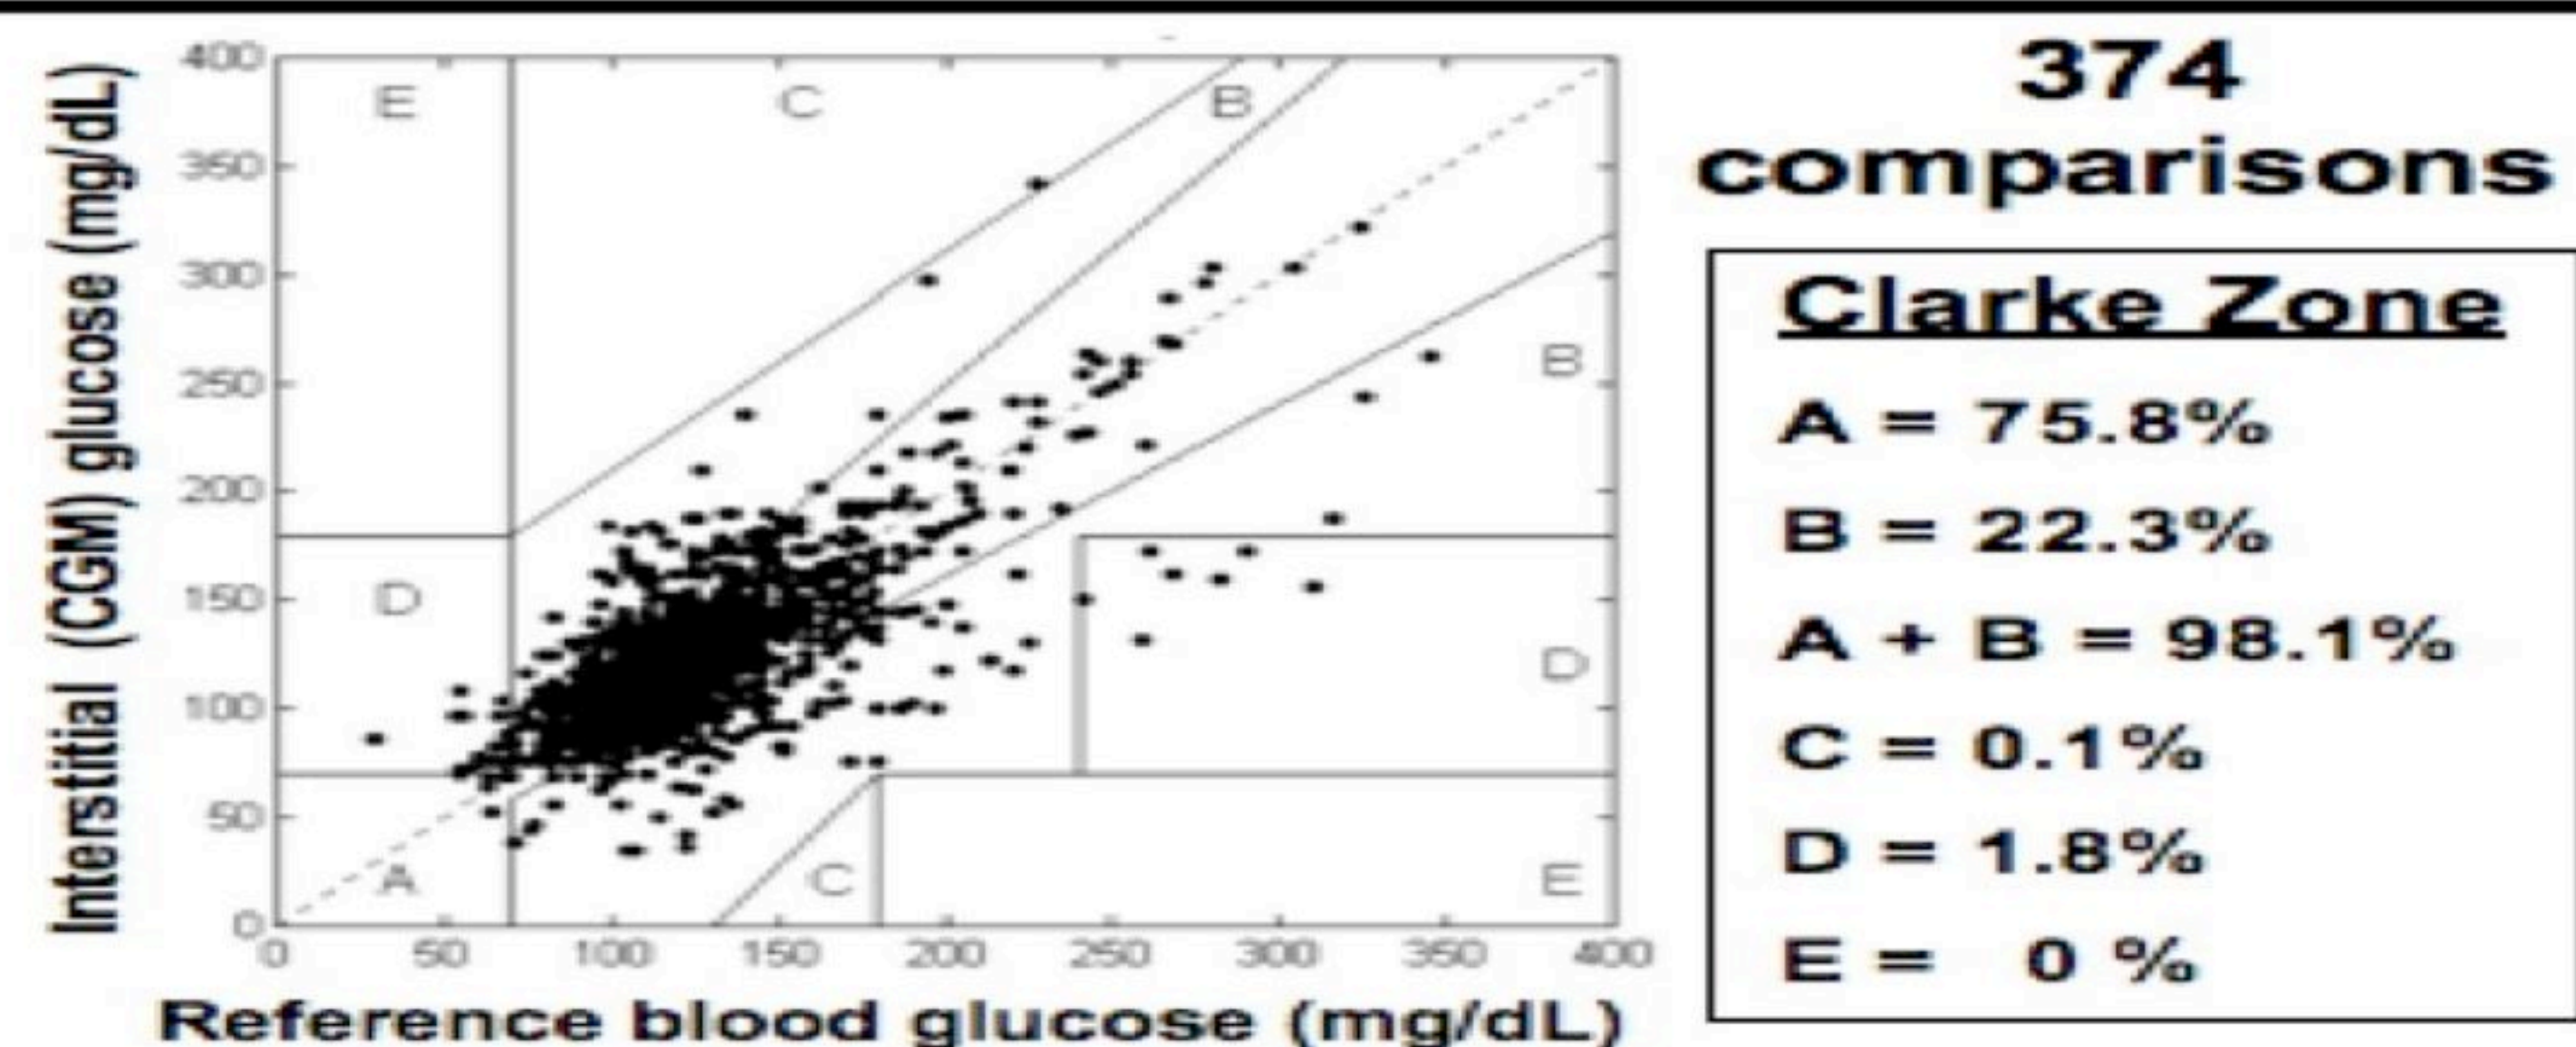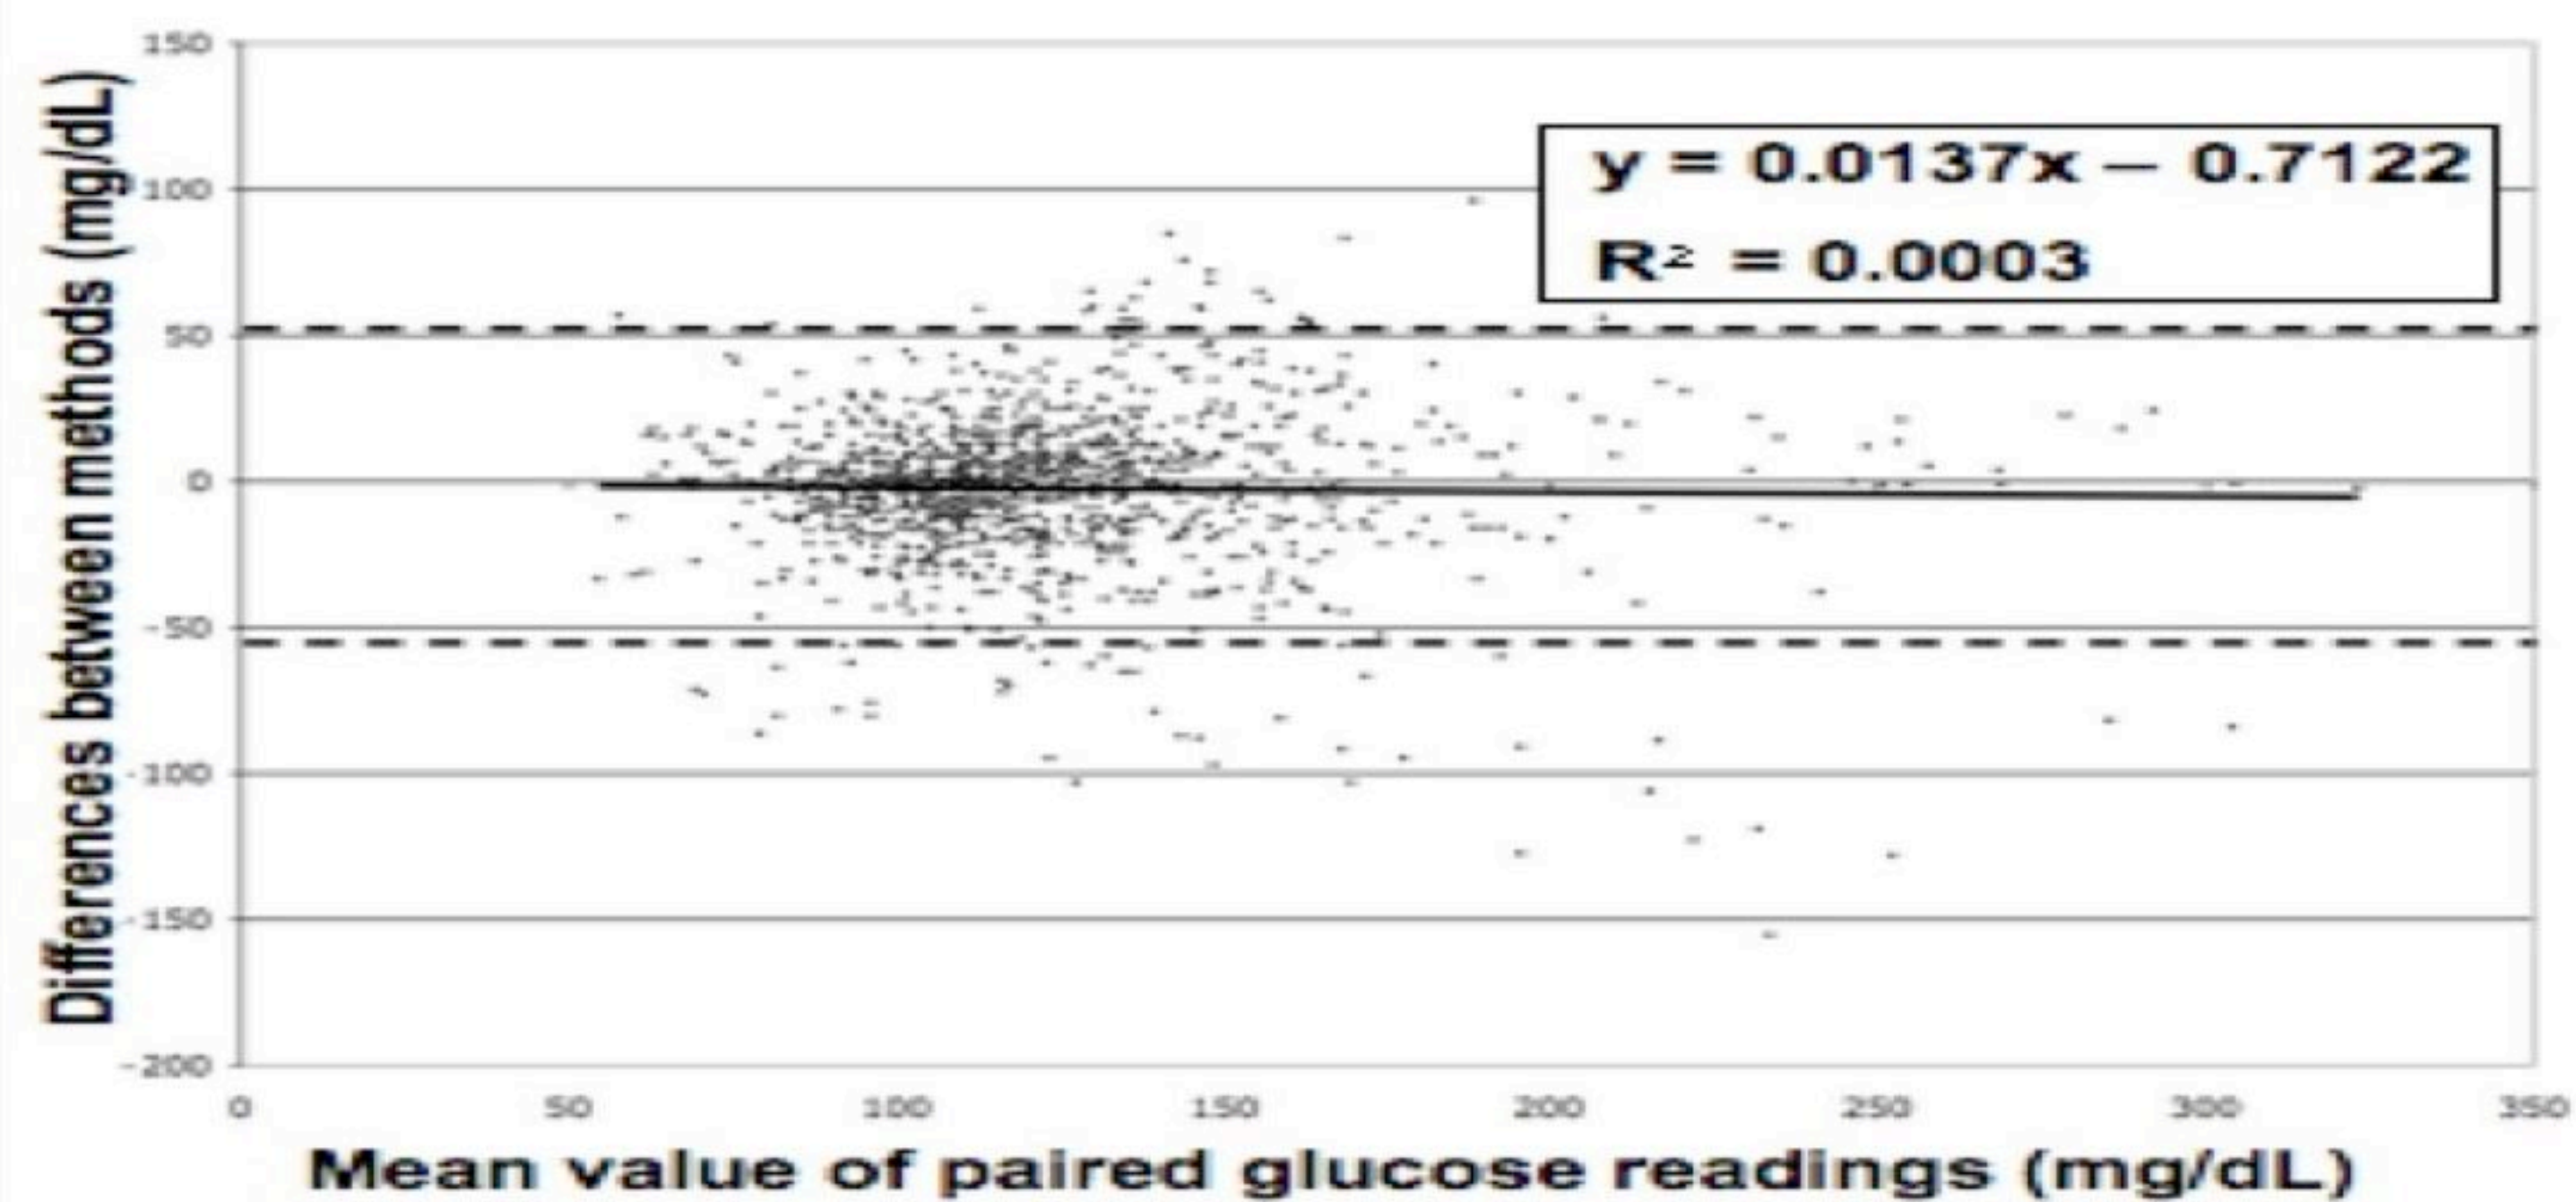

## C. MV + VPI/Inotr (n=30)

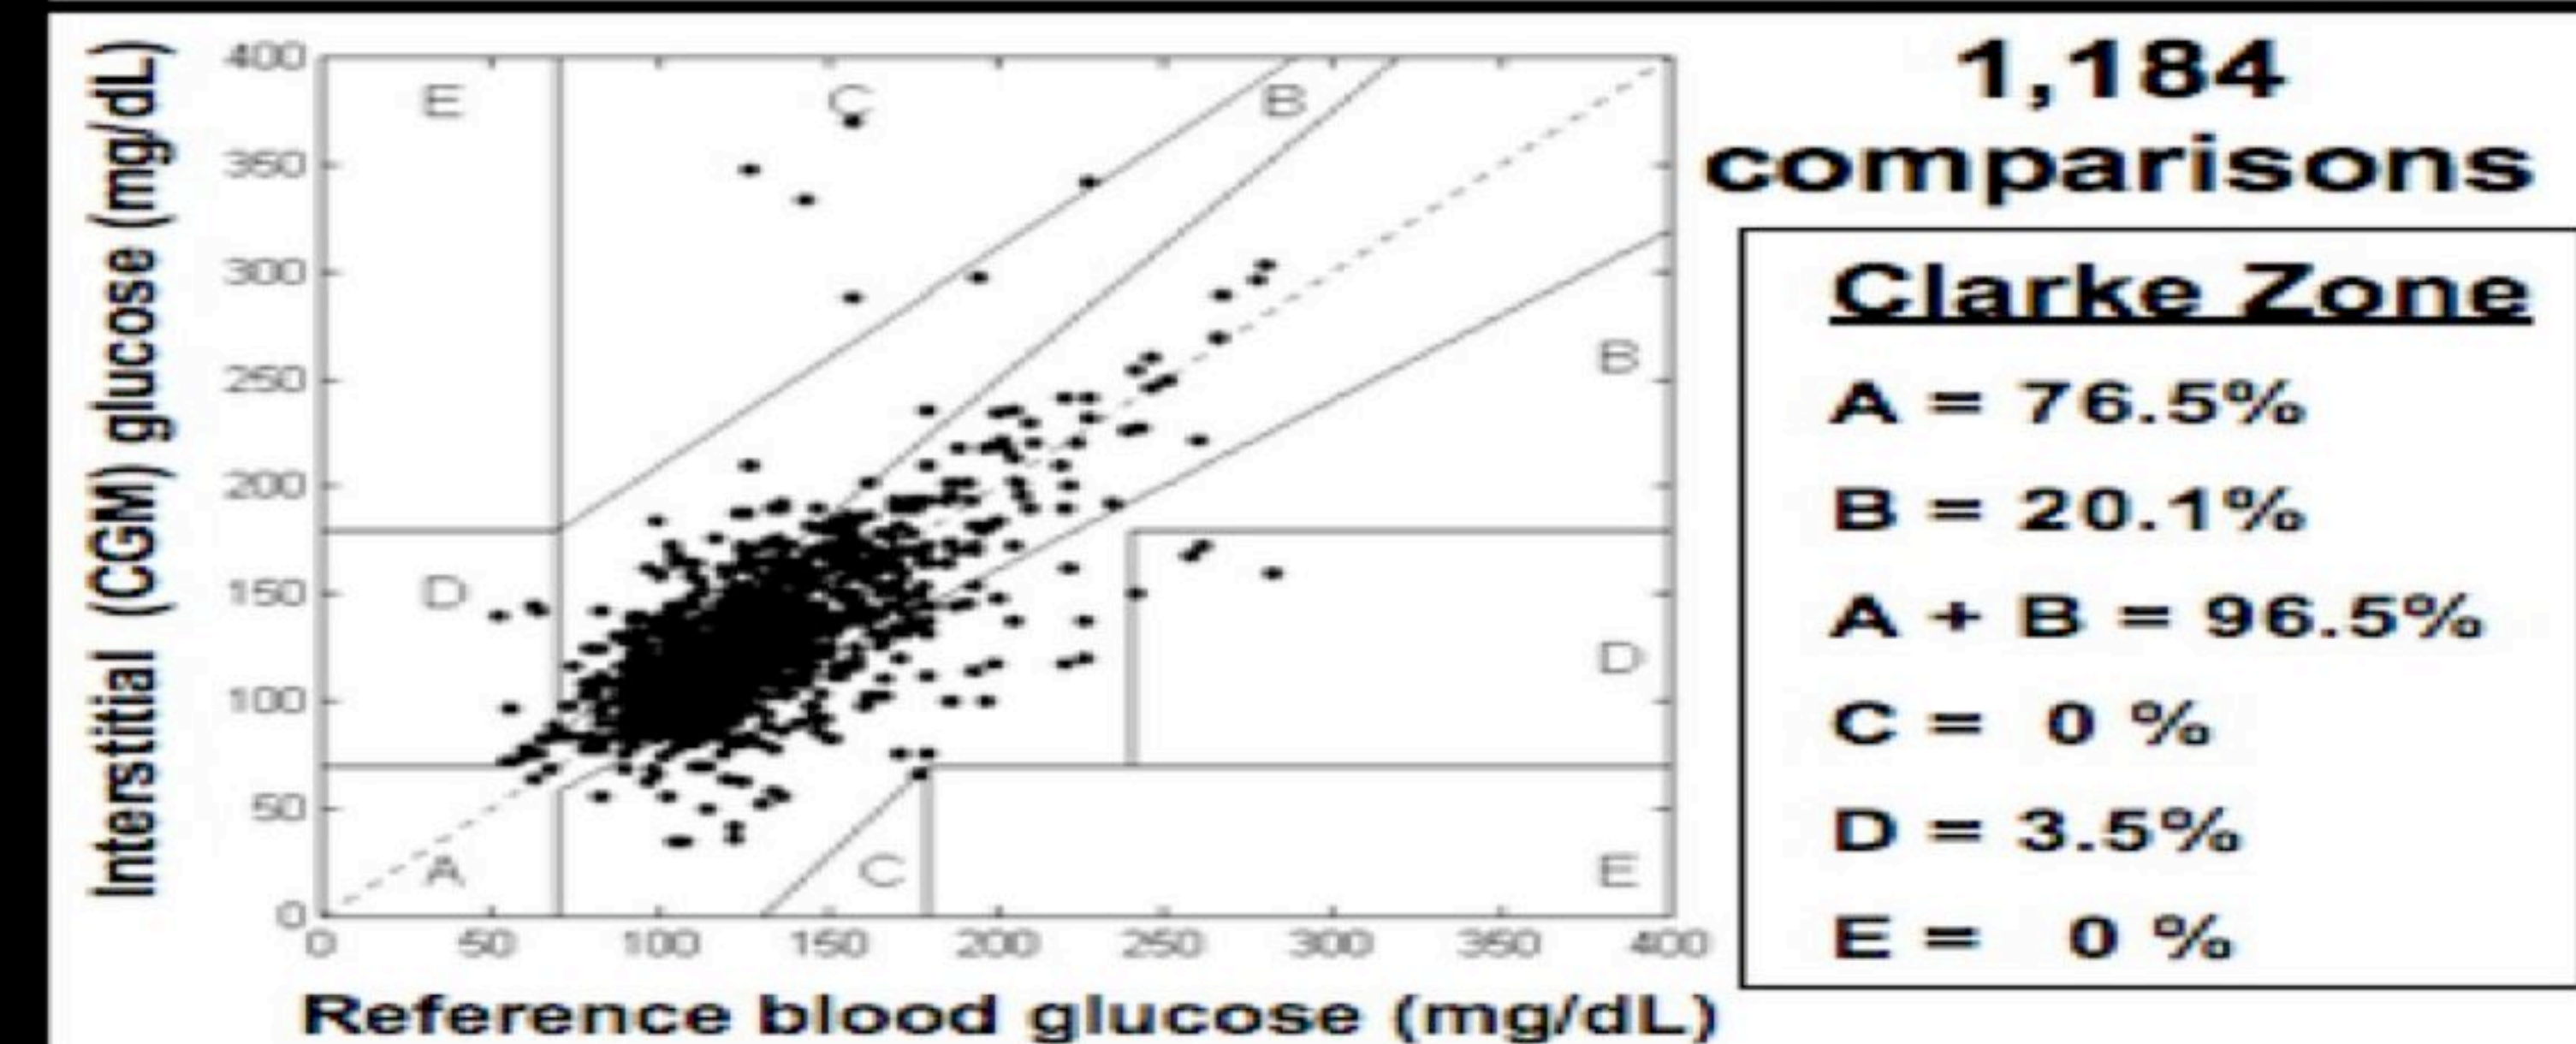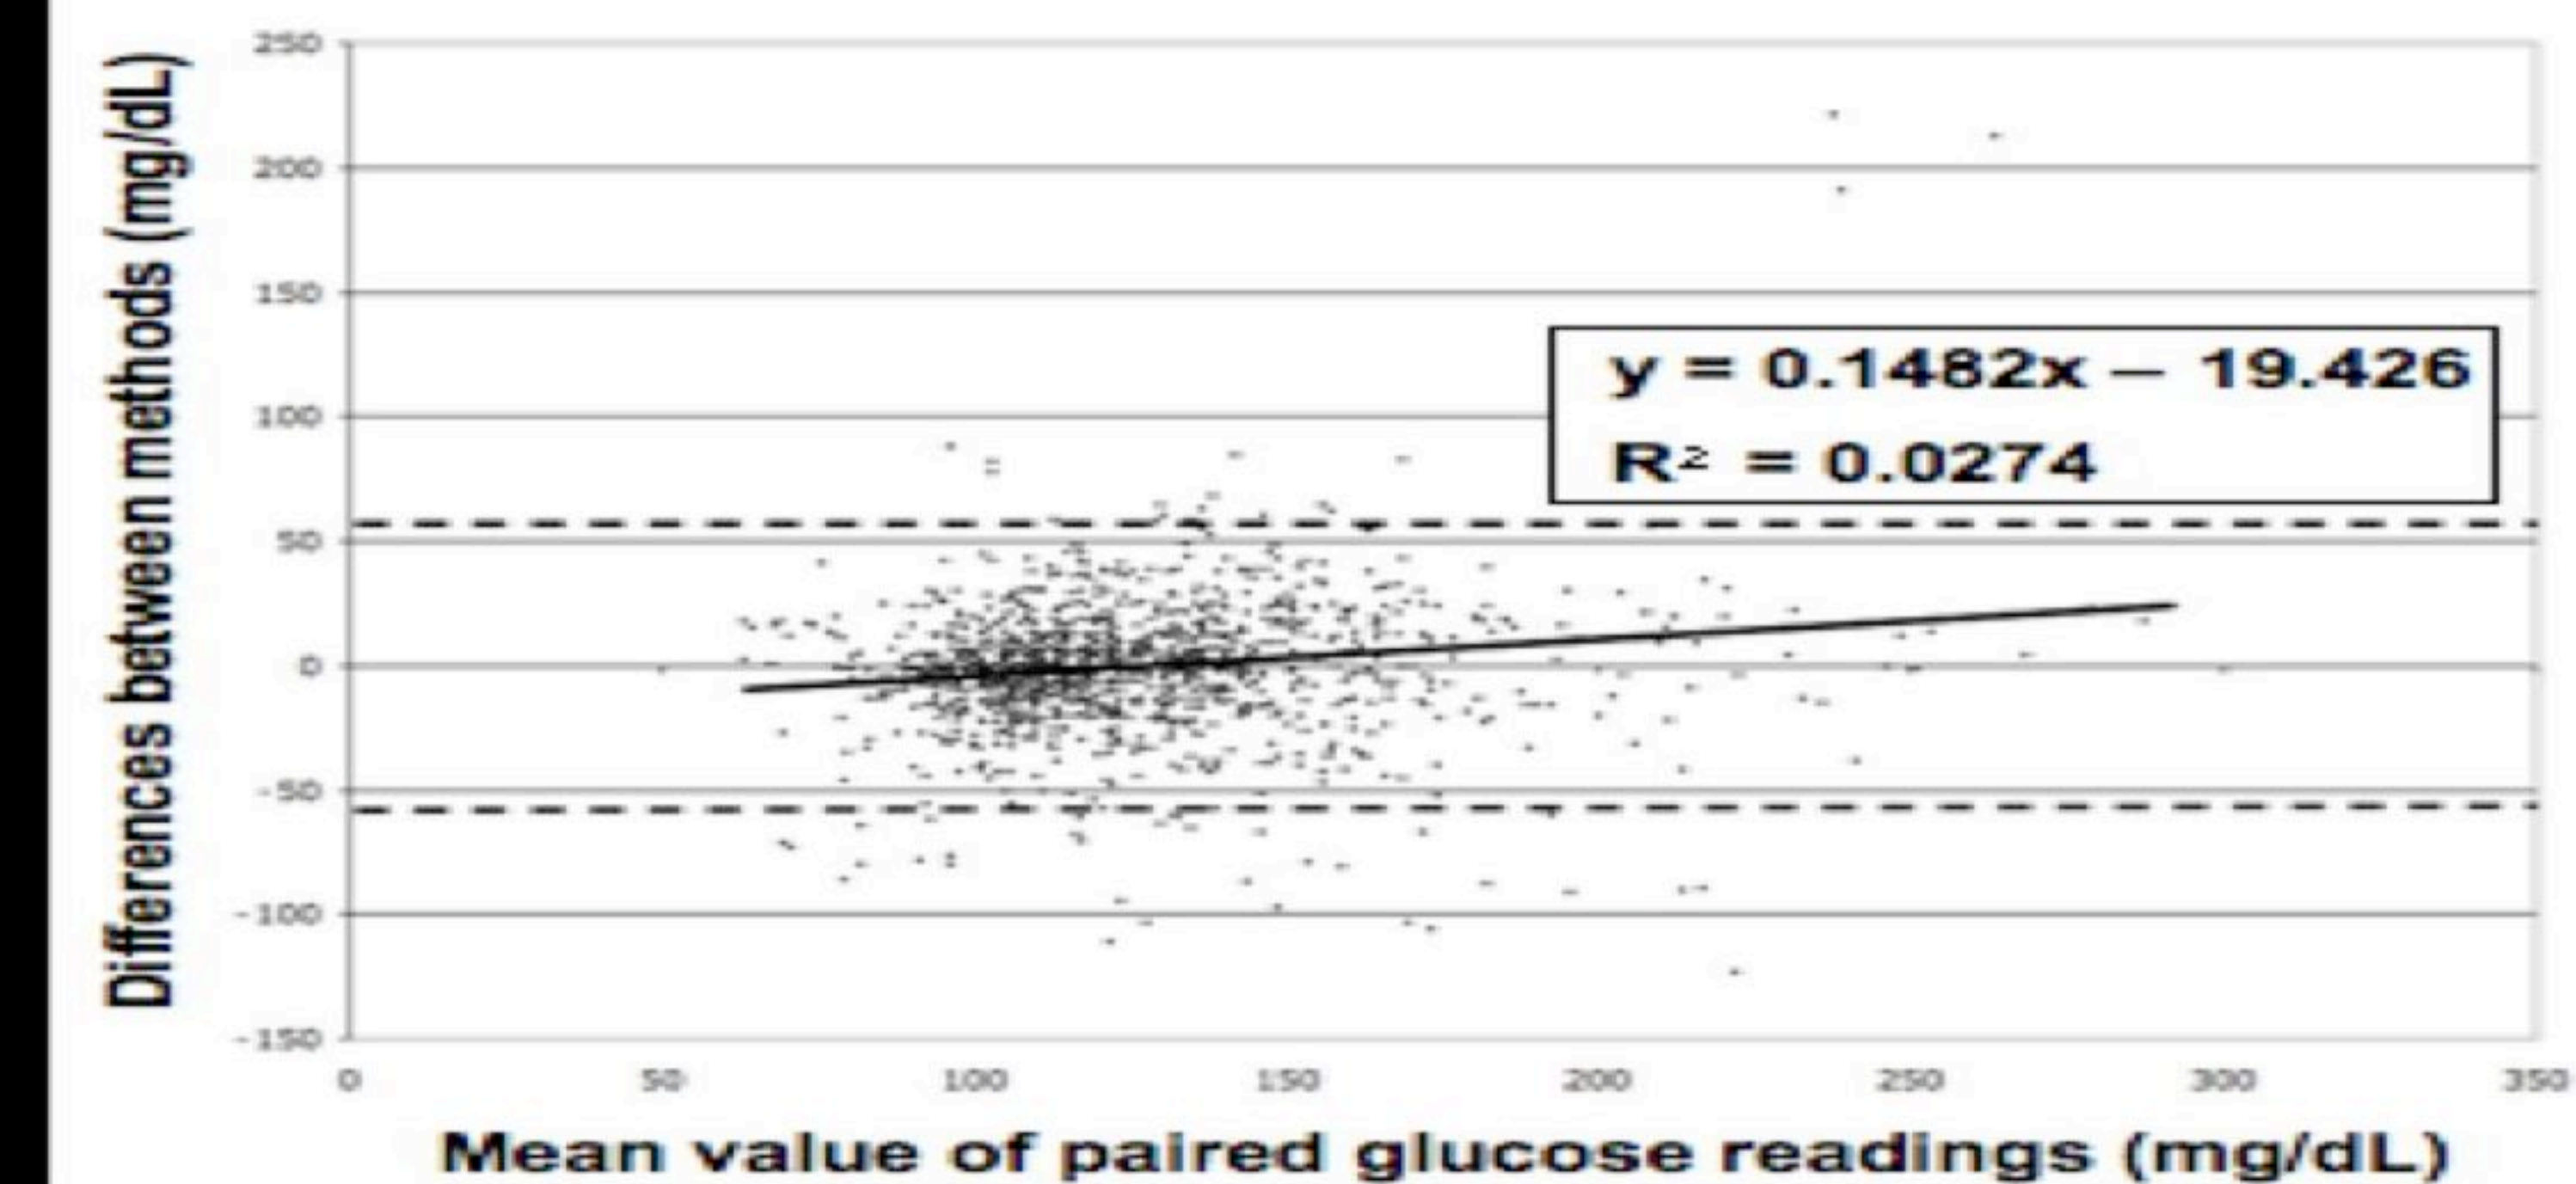

## D. CIH + Insulin (n=20)

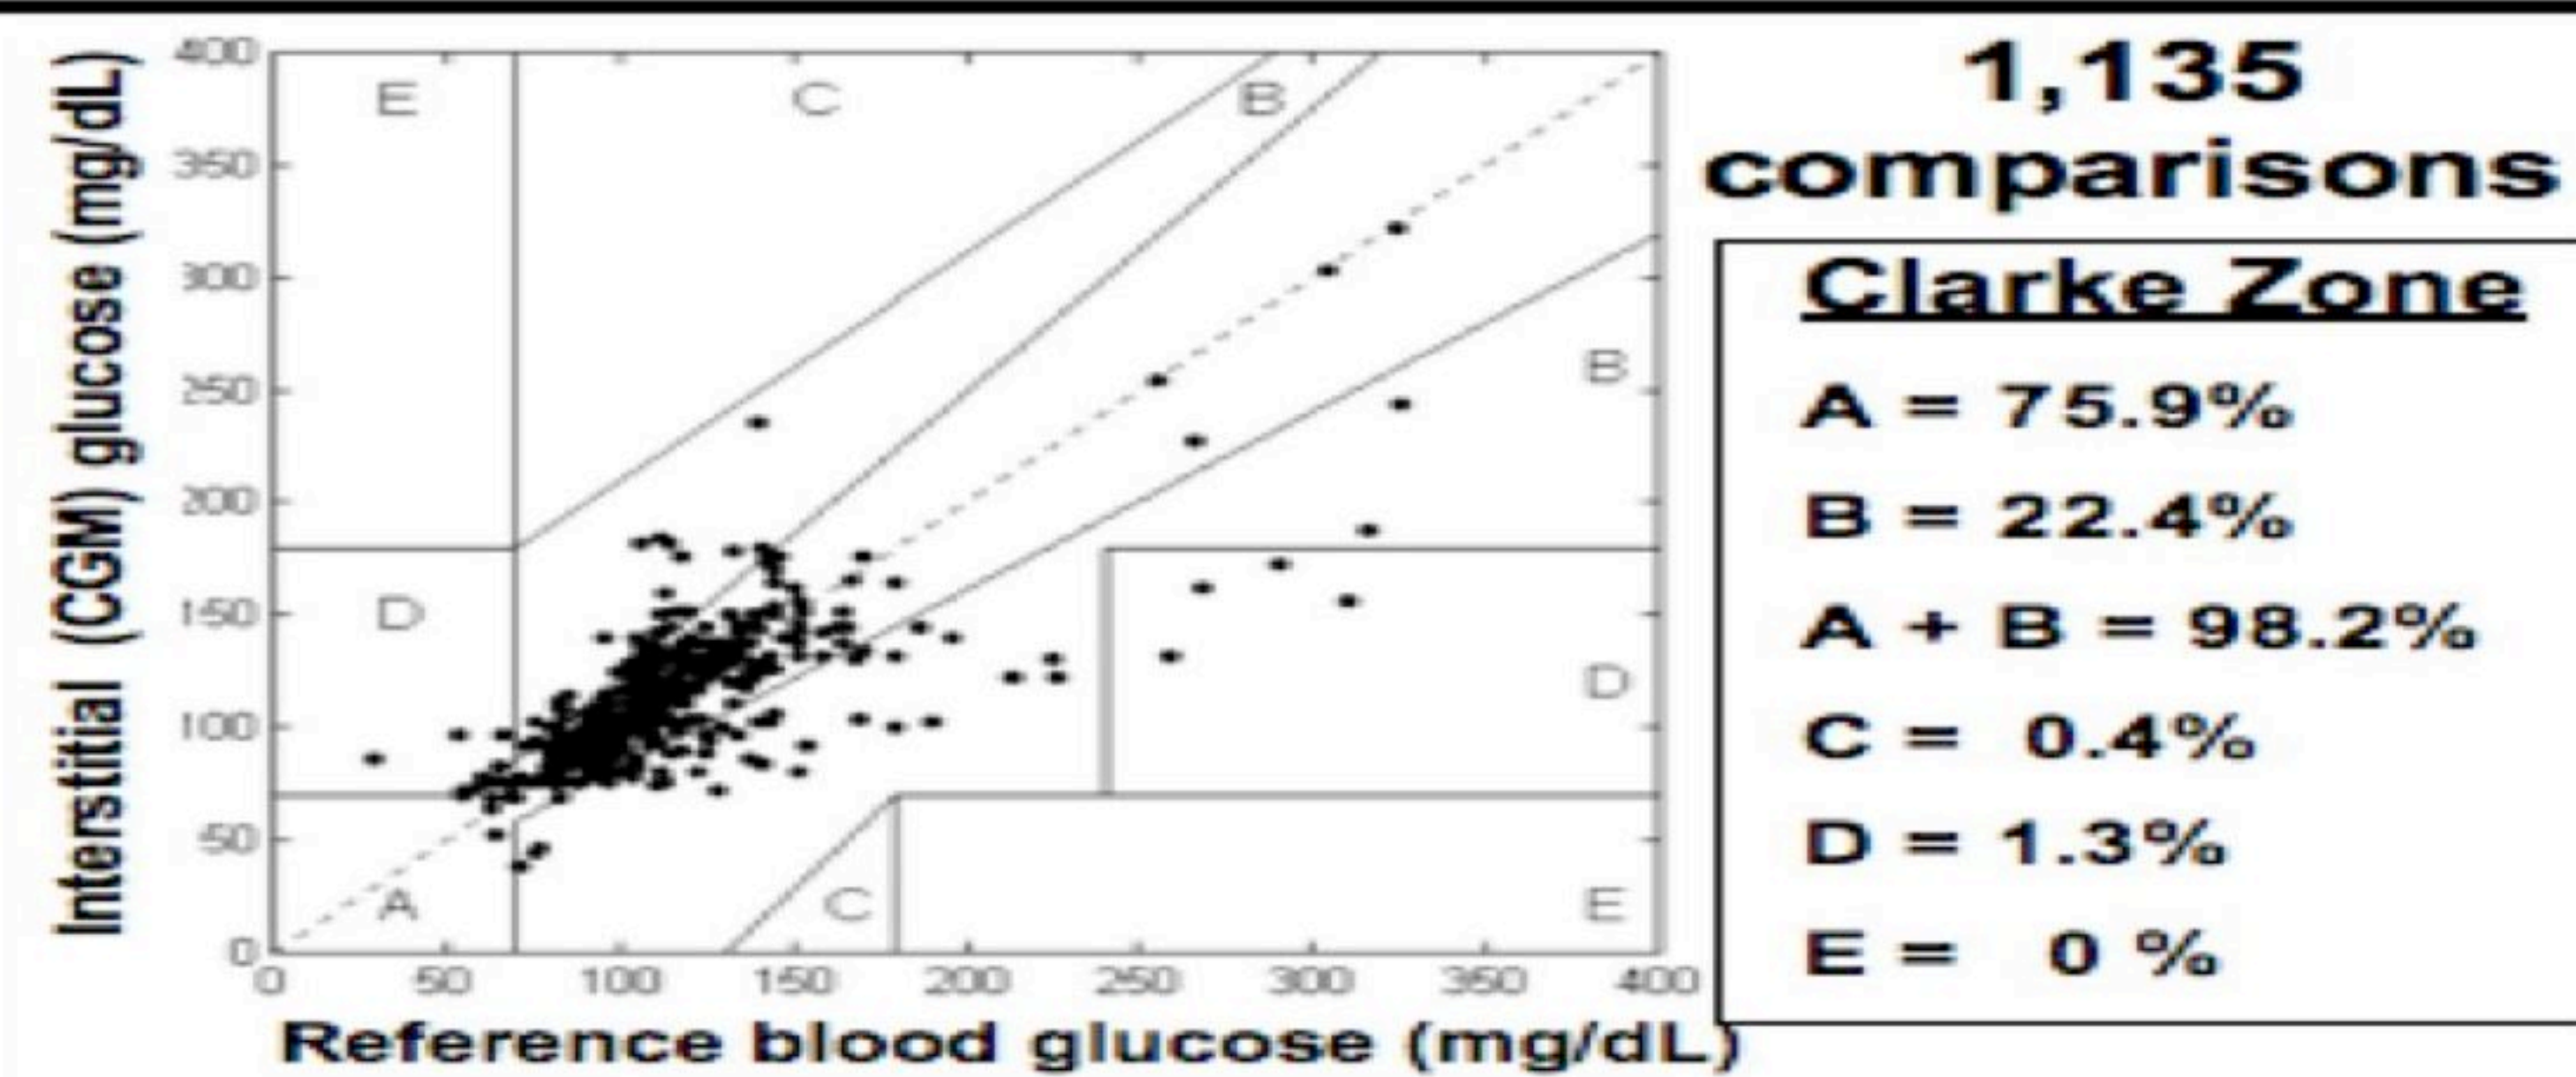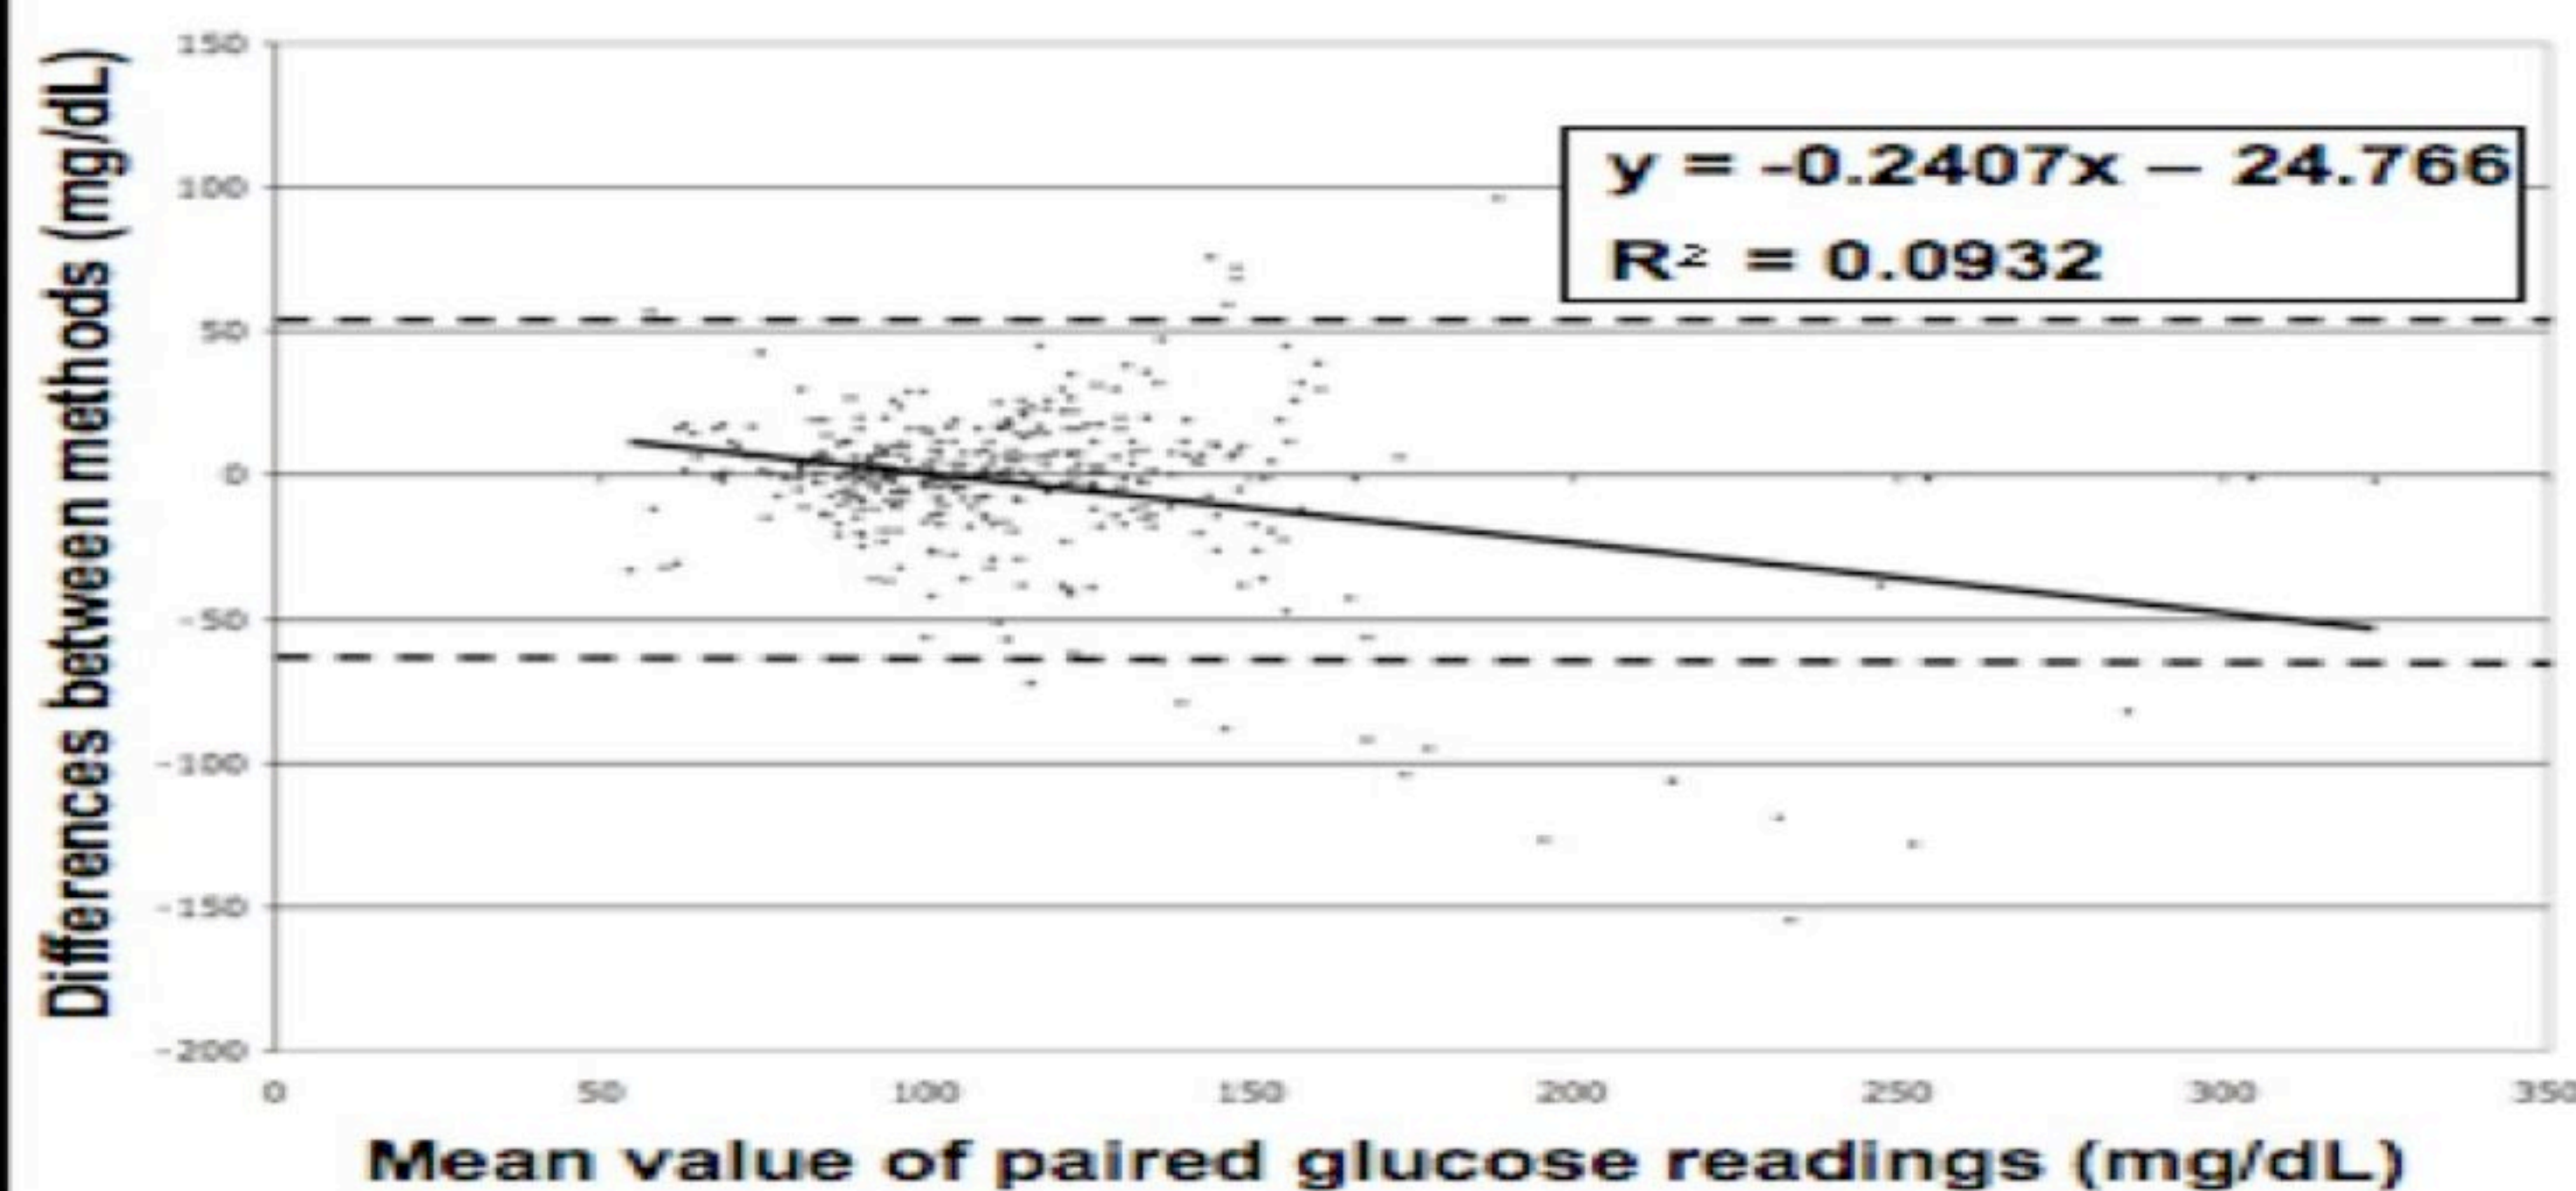

Supplement: MOESM2 [file 9732536]
